# Supplementary material for: Thermal, Physical, and Optical Properties of the Solution and Melt Synthesized Single Crystal CsPbBr3 Halide Perovskite
Source: MDPI journal article supplement (doi:10.3390/chemosensors10090369), 2022-09-16
Supplement: s1 [file s1]

# Thermal, physical, and optical properties of the solution and melt synthesized single crystal CsPbBr<sub>3</sub> halide perovskite

Kirti Agrawal <sup>1</sup>, Syed Mohammad Abid Hasan <sup>1</sup>, Joanna Blawat <sup>2,3</sup>, Nishir Mehta <sup>1</sup>, Yuming Wang <sup>4</sup>, Rafael Cueto <sup>5</sup>, Miriam Siebenbuerger <sup>6</sup>, Orhan Kizilkaya <sup>6</sup>, Narasimha S. Prasad <sup>7</sup>, James Dorman <sup>4</sup>, Rongying Jin <sup>2,3</sup> and Manas Ranjan Gartia <sup>1,\*</sup>

<sup>1</sup> Department of Mechanical and Industrial Engineering, Louisiana State University, Baton Rouge, LA 70803, USA

<sup>2</sup> Department of Physics and Astronomy, Louisiana State University, Baton Rouge, LA 70803, USA

<sup>3</sup> Center for Experimental Nanoscale Physics, Department of Physics and Astronomy, University of South Carolina, Columbia, SC 29208, USA

<sup>4</sup> Department of Chemical Engineering, Louisiana State University, Baton Rouge, LA 70803, USA

<sup>5</sup> Department of Chemistry, Louisiana State University, Baton Rouge, LA 70803, USA

<sup>6</sup> Center for Advanced Microstructures and Devices, Baton Rouge, LA 70806, USA

<sup>7</sup> NASA Langley Research Center, Hampton, VA 23681, USA

\* Correspondence: mgartia@lsu.edu

**Table S1.** Positron Annihilation Lifetime Spectroscopy (PALS) data analysis.

| Material Name                               | $\tau_1$<br>(ns) | $I_1$<br>(%) | $\tau_2$<br>(ns) | $I_2$<br>(%) | $\tau_3$<br>(ns) | $I_3$<br>(%) | $\tau_{av}$<br>(ns) | $\tau_b$<br>(ns) | $K_d$<br>(1/ns) | $\tau_2 - \tau_b$<br>(ns) | $\tau_2/\tau_b$ |
|---------------------------------------------|------------------|--------------|------------------|--------------|------------------|--------------|---------------------|------------------|-----------------|---------------------------|-----------------|
| CsPbBr <sub>3</sub><br>(floating zone)      | 0.1986           | 37.6         | 0.3698           | 57.823       | 2.1877           | 4.5658       | 0.6880              | 0.0029           | 134.7923        | 0.3669                    | 127.85          |
| CsPbBr <sub>3</sub><br>(chemical synthesis) | 0.17             | 32.6         | 0.348            | 61.836       | 2.0802           | 5.5047       | 0.7168              | 0.0027           | 186.0524        | 0.3453                    | 128.69          |

**Table S2.** Fit parameters for the Fluorescence Lifetime Imaging Microscopy (FLIM) data for CsPbBr<sub>3</sub> synthesized with melt and solution-based methods.

| Parameter                  | Floating zone |         | Chemical synthesis |          |
|----------------------------|---------------|---------|--------------------|----------|
|                            | Value         | $\pm$   | Value              | $\pm$    |
| Lifetime ( $\tau$ ) 1 [ns] | 0.083         | 0.011   | 0.218              | 0.054    |
| Lifetime ( $\tau$ ) 2 [ns] | 0.329         | 0.029   | 0.601              | 0.219    |
| Lifetime ( $\tau$ ) 3 [ns] | 1.199         | 0.082   | 1.923              | 0.85     |
| Lifetime ( $\tau$ ) 4 [ns] | 6.274         | 0.612   | 7.855              | 1.313    |
| Amplitude 1 [kCnts]        | 3181.521      | 188.583 | 3908.486           | 1017.625 |
| Amplitude 2 [kCnts]        | 742.895       | 136.864 | 1920.121           | 820.878  |
| Amplitude 3 [kCnts]        | 148.53        | 14.672  | 1049.036           | 219.662  |
| Amplitude 4 [kCnts]        | 15.57         | 2.403   | 422.145            | 175.514  |
| Sum Amplitudes [kCnts]     | 4088.516      | 150.119 | 7299.788           | 362.886  |

|                                          |          |         |            |          |
|------------------------------------------|----------|---------|------------|----------|
| Sum Intensity [kCnts]                    | 7930.434 | 224.892 | 68,067.408 | 1791.339 |
| Mean $\tau$ , Intensity Weighted<br>[ns] | 1.092    | 0.044   | 3.791      | 0.526    |
| Mean $\tau$ , Amplitude Weighted<br>[ns] | 0.192    | 0.008   | 1.006      | 0.064    |
| $\chi^2$                                 | 11.745   |         | 67.338     |          |
